# Supplementary material for: Prevalence, trend, and associated risk factors for cleft lip with/without cleft palate: a national study on live births from 2016 to 2021
Source: Springer Nature journal article supplement (doi:10.1186/s12903-023-03797-z), 2024-01-07
Supplement: MOESM3 [file 26604566]

### Appendix 3. Smoking Pattern of CLP-affected Pregnancies from 2016 to 2021

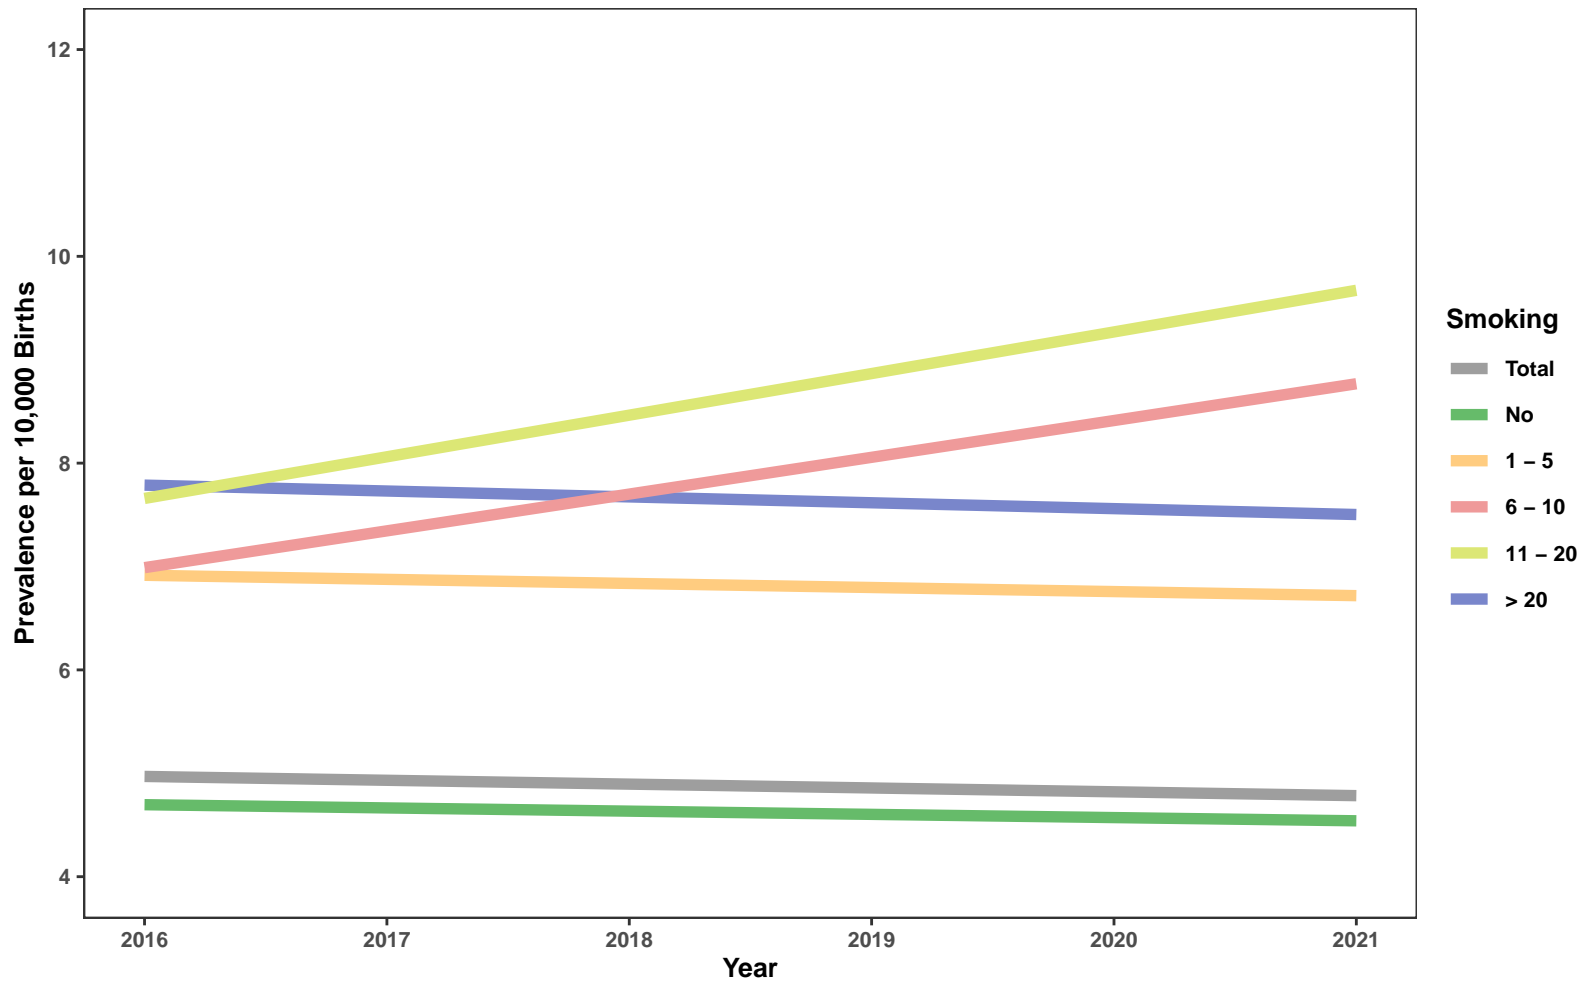

(1) Insignificant Trend from 2016 to 2021 among All Groups ( $p > 0.05$ ).

(2) Significant Difference Between All Groups ( $p < 0.05$ ).
